# Supplementary material for: Rapid Detection and Quantification of Viable Cells of Pectobacterium brasiliense Using Propidium Monoazide Combined with Real-Time PCR
Source: MDPI journal article supplement (doi:10.3390/microorganisms11112808), 2023-11-19
Supplement: s1 [file s1]

**Table S1. Sequence information on the amplification products of primers specific for *Pectobacterium brasiliensis***

| Strain No. | Species                           | Isolate code   | Sequences(5'-3')                                                                                                                                   |
|------------|-----------------------------------|----------------|----------------------------------------------------------------------------------------------------------------------------------------------------|
| 1          | <i>Pectobacterium brasiliense</i> | SX 309         | GCGTGCCGGGTTTATGACCTGGTGCGGATTTTTCGTGTCCCCATCGTCTAGAGGCCTAGGACACTGCCCTTTCA<br>CGGCTGTAACAGGGGTTTCAATCCCCTTGGGGACGCCAATCCGATAATGAGTGAAAGACATTATCATT |
| 2          | <i>Pectobacterium brasiliense</i> | B6             | GCGTGCCGGGTTTATGACCTGGTGCGGATTTTTCGTGTCCCCATCGTCTAGAGGCCTAGGACACTGCCCTTTCA<br>CGGCTGTAACAGGGGTTTCAATCCCCTTGGGGACGCCAATCCGATAATGAGTGAAAGACATTATCATT |
| 3          | <i>Pectobacterium brasiliense</i> | KC08           | GCGTGCCGGGTTTATGACCTGGTGCGGATTTTTCGTGTCCCCATCGTCTAGAGGCCTAGGACACTGCCCTTTCA<br>CGGCTGTAACAGGGGTTTCAATCCCCTTGGGGACGCCAATCCGATAATGAGTGAAAGACATTATCATT |
| 4          | <i>Pectobacterium brasiliense</i> | WBC 12         | GCGTGCCGGGTTTATGACCTGGTGCGGATTTTTCGTGTCCCCATCGTCTAGAGGCCTAGGACACTGCCCTTTCA<br>CGGCTGTAACAGGGGTTTCAATCCCCTTGGGGACGCCAATCCGATAATGAGTGAAAGACATTATCATT |
| 5          | <i>Pectobacterium brasiliense</i> | WQC 3          | GCGTGCCGGGTTTATGACCTGGTGCGGATTTTTCGTGTCCCCATCGTCTAGAGGCCTAGGACACTGCCCTTTCA<br>CGGCTGTAACAGGGGTTTCAATCCCCTTGGGGACGCCAATCCGATAATGAGTGAAAGACATTATCATT |
| 6          | <i>Pectobacterium brasiliense</i> | Y2             | GCGTGCCGGGTTTATGACCTGGTGCGGATTTTTCGTGTCCCCATCGTCTAGAGGCCTAGGACACTGCCCTTTCA<br>CGGCTGTAACAGGGGTTTCAATCCCCTTGGGGACGCCAATCCGATAATGAGTGAAAGACATTATCATT |
| 7          | <i>Pectobacterium brasiliense</i> | WYC 1          | GCGTGCCGGGTTTATGACCTGGTGCGGATTTTTCGTGTCCCCATCGTCTAGAGGCCTAGGACACTGCCCTTTCA<br>CGGCTGTAACAGGGGTTTCAATCCCCTTGGGGACGCCAATCCGATAATGAGTGAAAGACATTATCATT |
| 8          | <i>Pectobacterium brasiliense</i> | HG150 129030 1 | GCGTGCCGGGTTTATGACCTGGTGCGGATTTTTCGTGTCCCCATCGTCTAGAGGCCTAGGACACTGCCCTTTCA<br>CGGCTGTAACAGGGGTTTCAATCCCCTTGGGGACGCCAATCCGATAATGAGTGAAAGACATTATCATT |
| 9          | <i>Pectobacterium brasiliense</i> | HG150 129030 2 | GCGTGCCGGGTTTATGACCTGGTGCGGATTTTTCGTGTCCCCATCGTCTAGAGGCCTAGGACACTGCCCTTTCA<br>CGGCTGTAACAGGGGTTTCAATCCCCTTGGGGACGCCAATCCGATAATGAGTGAAAGACATTATCATT |

---

|    |                                       |                      |                                                                                                                                                    |
|----|---------------------------------------|----------------------|----------------------------------------------------------------------------------------------------------------------------------------------------|
| 10 | <i>Pectobacterium<br/>brasiliense</i> | HG150<br>129030<br>3 | GCGTGCCGGGTTTATGACCTGGTGCGGATTTTTCGTGTCCCCATCGTCTAGAGGCCTAGGACACTGCCCTTTCA<br>CGGCTGTAACAGGGGTTTCAATCCCCTTGGGGACGCCAATCCGATAATGAGTGAAAGACATTATCATT |
| 11 | <i>Pectobacterium<br/>brasiliense</i> | HG150<br>129030<br>4 | GCGTGCCGGGTTTATGACCTGGTGCGGATTTTTCGTGTCCCCATCGTCTAGAGGCCTAGGACACTGCCCTTTCA<br>CGGCTGTAACAGGGGTTTCAATCCCCTTGGGGACGCCAATCCGATAATGAGTGAAAGACATTATCATT |
| 12 | <i>Pectobacterium<br/>brasiliense</i> | HG150<br>129030<br>5 | GCGTGCCGGGTTTATGACCTGGTGCGGATTTTTCGTGTCCCCATCGTCTAGAGGCCTAGGACACTGCCCTTTCA<br>CGGCTGTAACAGGGGTTTCAATCCCCTTGGGGACGCCAATCCGATAATGAGTGAAAGACATTATCATT |
| 13 | <i>Pectobacterium<br/>brasiliense</i> | HG150<br>129030<br>6 | GCGTGCCGGGTTTATGACCTGGTGCGGATTTTTCGTGTCCCCATCGTCTAGAGGCCTAGGACACTGCCCTTTCA<br>CGGCTGTAACAGGGGTTTCAATCCCCTTGGGGACGCCAATCCGATAATGAGTGAAAGACATTATCATT |
| 14 | <i>Pectobacterium<br/>brasiliense</i> | HG150<br>129030<br>7 | GCGTGCCGGGTTTATGACCTGGTGCGGATTTTTCGTGTCCCCATCGTCTAGAGGCCTAGGACACTGCCCTTTCA<br>CGGCTGTAACAGGGGTTTCAATCCCCTTGGGGACGCCAATCCGATAATGAGTGAAAGACATTATCATT |
| 15 | <i>Pectobacterium<br/>brasiliense</i> | HG150<br>129030<br>8 | GCGTGCCGGGTTTATGACCTGGTGCGGATTTTTCGTGTCCCCATCGTCTAGAGGCCTAGGACACTGCCCTTTCA<br>CGGCTGTAACAGGGGTTTCAATCCCCTTGGGGACGCCAATCCGATAATGAGTGAAAGACATTATCATT |

---

**Table S2.** The impact of soaking *Pbr* seeds in warm broth on mortality

| Treatment time<br>(min) | Mortality rates of <i>P. brasiliense</i> in different temperature<br>treatments (%) <sup>a</sup> |           |           |
|-------------------------|--------------------------------------------------------------------------------------------------|-----------|-----------|
|                         | 50                                                                                               | 55        | 60        |
| 10                      | 78.2±4.9a                                                                                        | 89.6±3.8a | 97.3±1.1a |
| 30                      | 89.6±4.2b                                                                                        | 95.0±2.0b | 100b      |
| 60                      | 97.3±5.6c                                                                                        | 100c      | 100b      |

<sup>a</sup> This result was determined by plate counting. Note: The data are presented as the averages ± SEs.

**Table S3.** Dynamic lesions and number of viable cells of *Pbr* in cucumber and potato leaves from 0 to 48 hours after infection with bacterial soft rot.

| Plant leaves | The number of viable cells of <i>Pbr</i> in different time (10 <sup>4</sup> CFU/g) <sup>a</sup> |           |           |            |            |
|--------------|-------------------------------------------------------------------------------------------------|-----------|-----------|------------|------------|
|              | 0h                                                                                              | 12h       | 24h       | 36h        | 48h        |
| Potato       | 3.2±0.1a                                                                                        | 21.6±2.2b | 73.4±2.4c | 168.4±7.1d | 421.5±5.4e |
| Cucumber     | 0.9±0.1a                                                                                        | 6.7±1.3b  | 21.3±4.1c | 98.3±4.8d  | 165.2±7.2e |

<sup>a</sup> This result was determined by plate counting. Note: The data are presented as the averages ± SEs.
